# Supplementary material for: A detailed theoretical investigation to unravel the molecular mechanism of the ligand-free copper-catalyzed Suzuki cross-coupling reaction
Source: Royal Society of Chemistry journal article supplement (doi:10.1039/d2ob00371f), 2022-01-01
Supplement: d2ob00371f1.pdf [file d2ob00371f1.pdf]

## Supplementary data

### A Detailed Theoretical Investigation to Unravel the Molecular Mechanism of Ligand-free Copper-Catalyzed Suzuki Cross-Coupling Reaction

C. Rajalakshmi,<sup>a</sup> Anandhu Krishnan,<sup>a</sup> Salim Saranya,<sup>c</sup> Gopinathan Anilkumar,<sup>\*b,c</sup> Vibin Ipe Thomas<sup>\*a,b</sup>

<sup>a</sup> Department of Chemistry, CMS College, Kottayam, Kerala, 686001, India

<sup>b</sup> Institute for Integrated Programmes and Research in Basic Sciences, Mahatma Gandhi University, Priyadarsini Hills P.O, Kottayam, Kerala, 686560, India

<sup>c</sup> School of Chemical Sciences, Mahatma Gandhi University, Priyadarsini Hills P.O, Kottayam, Kerala, 686560, India

#### Reference

Gaussian 09, Revision [D.01](#), M. J. Frisch, G. W. Trucks, H. B. Schlegel, G. E. Scuseria, M. A. Robb, J. R. Cheeseman, G. Scalmani, V. Barone, B. Mennucci, G. A. Petersson, H. Nakatsuji, M. Caricato, X. Li, H. P. Hratchian, A. F. Izmaylov, J. Bloino, G. Zheng, J. L. Sonnenberg, M. Hada, M. Ehara, K. Toyota, R. Fukuda, J. Hasegawa, M. Ishida, T. Nakajima, Y. Honda, O. Kitao, H. Nakai, T. Vreven, J. A. Montgomery, Jr., J. E. Peralta, F. Ogliaro, M. Bearpark, J. J. Heyd, E. Brothers, K. N. Kudin, V. N. Staroverov, R. Kobayashi, J. Normand, K. Raghavachari, A. Rendell, J. C. Burant, S. S. Iyengar, J. Tomasi, M. Cossi, N. Rega, J. M. Millam, M. Klene, J. E. Knox, J. B. Cross, V. Bakken, C. Adamo, J. Jaramillo, R. Gomperts, R. E. Stratmann, O. Yazyev, A. J. Austin, R. Cammi, C. Pomelli, J. W. Ochterski, R. L. Martin, K. Morokuma, V. G. Zakrzewski, G. A. Voth, P. Salvador, J. J. Dannenberg, S. Dapprich, A. D. Daniels, O. Farkas, J. B. Foresman, J. V. Ortiz, J. Cioslowski, and D. J. Fox, Gaussian, Inc., Wallingford CT, 2016.

## I. Cartesian coordinates for Model System

(A) EtOH-Cu-I

**E sol= -1806.8064411 a.u**

**G sol= -1806.842709 a.u**

|    |           |           |           |
|----|-----------|-----------|-----------|
| O  | -2.386943 | -0.539516 | -0.022751 |
| Cu | -0.459830 | -0.259287 | 0.009496  |
| I  | 1.970132  | 0.101624  | -0.011745 |
| H  | -2.701523 | -1.294784 | 0.505781  |
| C  | -3.283689 | 0.603669  | 0.175702  |
| C  | -4.713037 | 0.229004  | -0.166760 |
| H  | -2.891015 | 1.371926  | -0.492502 |
| H  | -3.181416 | 0.946653  | 1.210142  |

|   |           |           |           |
|---|-----------|-----------|-----------|
| H | -5.358841 | 1.106008  | -0.043897 |
| H | -4.787484 | -0.117591 | -1.202762 |
| H | -5.085748 | -0.558861 | 0.498700  |

(B) Aryl Boronic acid

**E sol = -408.297741 a.u**

**G sol = -408.206027 a.u**

|   |           |           |           |
|---|-----------|-----------|-----------|
| B | 1.740805  | -0.000002 | -0.000011 |
| O | 2.388581  | -1.214183 | 0.021811  |
| H | 3.357328  | -1.178067 | 0.026781  |
| O | 2.388573  | 1.214185  | -0.021805 |
| H | 3.357320  | 1.178078  | -0.026737 |
| C | 0.174365  | 0.000004  | -0.000014 |
| C | -0.551925 | -1.207209 | -0.010313 |
| C | -0.551929 | 1.207212  | 0.010311  |
| C | -1.949962 | -1.211611 | -0.011490 |
| H | -0.012880 | -2.151166 | -0.018371 |
| C | -1.949965 | 1.211607  | 0.011494  |
| H | -0.012884 | 2.151169  | 0.018375  |
| C | -2.651847 | -0.000003 | 0.000001  |
| H | -2.491704 | -2.154303 | -0.021154 |
| H | -2.491710 | 2.154297  | 0.021174  |
| H | -3.739148 | -0.000003 | 0.000010  |

(C)  $K_2PO_4^-$

**E solv = -698.972636 a.u**

**G solv = -698.994904 a.u**

|   |           |           |           |
|---|-----------|-----------|-----------|
| O | 1.847561  | -0.495133 | 1.567719  |
| O | -0.148839 | -0.857293 | -0.036401 |
| P | 0.597093  | 0.193631  | 0.897843  |
| O | 1.091891  | 1.370017  | -0.053773 |
| O | -0.410630 | 0.764323  | 1.965923  |
| K | -1.675868 | 1.497654  | -0.854241 |
| K | 2.502136  | -0.905791 | -1.330147 |

(D)  $I^-$

**Gsol = - 11.586795a.u**

**E sol= - 11.569947a.u**

|   |            |            |            |
|---|------------|------------|------------|
| I | 0.00000000 | 0.00000000 | 0.00000000 |
|---|------------|------------|------------|

(E) Br

**Gsol = - 13.360540 a.u**

**E sol= -13.344365 a.u**

|    |            |            |            |
|----|------------|------------|------------|
| Br | 0.00000000 | 0.00000000 | 0.00000000 |
|----|------------|------------|------------|

(F) Int 1

**E sol= - -2494.326971 a.u**

**G sol = -2494.279891 a.u**

|    |           |           |           |
|----|-----------|-----------|-----------|
| O  | 2.921213  | -0.895675 | -0.750000 |
| O  | 1.298583  | 0.746416  | -1.959685 |
| P  | 1.497056  | -0.261083 | -0.781689 |
| O  | 1.171944  | 0.446238  | 0.589053  |
| O  | 0.437452  | -1.486792 | -0.970854 |
| K  | -0.061460 | 2.672923  | -0.473843 |
| K  | 3.528539  | -0.174346 | 1.880338  |
| Cu | -1.260499 | -1.180489 | -0.376291 |
| O  | -3.042006 | -0.902416 | 0.289560  |
| C  | -3.410348 | 0.453268  | 0.710237  |
| C  | -4.760491 | 0.452486  | 1.401713  |
| H  | -3.396503 | 1.103564  | -0.170287 |
| H  | -2.605916 | 0.752439  | 1.384111  |
| H  | -5.000351 | 1.469747  | 1.731888  |
| H  | -5.554581 | 0.124132  | 0.720332  |
| H  | -4.750118 | -0.205483 | 2.276908  |
| H  | -3.740864 | -1.263610 | -0.284873 |

(G) Int 2

**E sol= -2902.659407a.u**

**G sol = - 2902.494463a.u**

|    |           |           |           |
|----|-----------|-----------|-----------|
| O  | -2.705088 | 0.897781  | 0.683268  |
| O  | -0.631536 | -0.048404 | -0.492656 |
| P  | -2.084020 | 0.803770  | -0.742301 |
| O  | -1.642361 | 2.164073  | -1.302954 |
| O  | -2.890385 | -0.119548 | -1.685997 |
| K  | -4.235239 | -1.741320 | 0.247750  |
| K  | -1.546394 | 3.400199  | 1.283408  |
| Cu | 1.070635  | 0.708861  | -0.223946 |
| O  | 2.914600  | 1.156074  | 0.139985  |
| H  | 3.291488  | 0.387070  | 0.616934  |
| C  | 3.786897  | 1.479666  | -0.991769 |
| C  | 5.186634  | 1.809332  | -0.507767 |

|   |           |           |           |
|---|-----------|-----------|-----------|
| H | 3.779909  | 0.631418  | -1.683847 |
| H | 3.304995  | 2.333111  | -1.471696 |
| H | 5.168836  | 2.652406  | 0.190897  |
| H | 5.643524  | 0.945904  | -0.009421 |
| H | 5.816714  | 2.077309  | -1.363664 |
| C | 0.904464  | -1.906014 | 0.294107  |
| C | 1.793964  | -2.264455 | -0.740748 |
| C | 1.465666  | -1.700471 | 1.570991  |
| C | 3.173934  | -2.369032 | -0.529277 |
| H | 1.390465  | -2.430834 | -1.737023 |
| C | 2.845195  | -1.801002 | 1.801156  |
| H | 0.802798  | -1.427629 | 2.388835  |
| C | 3.707980  | -2.125859 | 0.744190  |
| H | 3.835418  | -2.628148 | -1.353211 |
| H | 3.248416  | -1.622869 | 2.795914  |
| H | 4.779952  | -2.196167 | 0.912617  |
| O | -1.494632 | -1.599313 | 1.212216  |
| O | -1.197572 | -2.363951 | -1.101404 |
| H | -1.854547 | -1.805119 | -1.564496 |
| H | -1.836275 | -0.699110 | 1.388878  |
| B | -0.664273 | -1.555252 | -0.007753 |

(H) TS 1

**G sol= -2902.470878a.u**

**E sol= -2902.636725a.u**

|    |           |           |           |
|----|-----------|-----------|-----------|
| O  | 1.918741  | 0.830333  | -1.455474 |
| O  | 1.189498  | 0.158162  | 0.915515  |
| P  | 2.209449  | 1.199058  | 0.031172  |
| O  | 1.710037  | 2.608002  | 0.400501  |
| O  | 3.636453  | 0.853798  | 0.500769  |
| K  | 3.965247  | -1.694002 | 1.449046  |
| K  | 0.037290  | 3.028307  | -1.797690 |
| Cu | -1.037112 | 0.345605  | 0.605755  |
| O  | -1.639776 | 2.194600  | 0.933934  |
| H  | -2.605532 | 2.302885  | 0.978427  |
| C  | -1.013866 | 2.907309  | 2.055793  |
| C  | -1.390971 | 4.377124  | 2.036995  |
| H  | -1.323719 | 2.417537  | 2.985267  |
| H  | 0.052949  | 2.755945  | 1.884984  |
| H  | -1.061724 | 4.854486  | 1.107838  |
| H  | -2.474202 | 4.517431  | 2.141443  |
| H  | -0.904280 | 4.887026  | 2.876985  |
| C  | -0.999424 | -1.457353 | -0.201550 |
| C  | -1.800209 | -2.444016 | 0.419601  |
| C  | -1.144586 | -1.335795 | -1.608002 |
| C  | -2.670261 | -3.270877 | -0.303910 |
| H  | -1.726058 | -2.576405 | 1.497828  |

|   |           |           |           |
|---|-----------|-----------|-----------|
| C | -2.013798 | -2.145634 | -2.344902 |
| H | -0.532762 | -0.603553 | -2.132502 |
| C | -2.779098 | -3.122318 | -1.691545 |
| H | -3.262140 | -4.026277 | 0.209753  |
| H | -2.094029 | -2.024908 | -3.423752 |
| H | -3.450759 | -3.761943 | -2.259887 |
| O | 1.676786  | -1.738444 | -0.542322 |
| O | 0.930306  | -2.049004 | 1.717976  |
| H | 0.734746  | -2.966690 | 1.477437  |
| H | 1.802856  | -0.988353 | -1.174833 |
| B | 0.931154  | -1.219050 | 0.549769  |

(I) **CuI**

**G sol = -1651.818034 a.u**

**E sol = -1651.793089 a.u**

|    |          |          |           |
|----|----------|----------|-----------|
| Cu | 0.000000 | 0.000000 | -1.593592 |
| I  | 0.000000 | 0.000000 | 0.871965  |

(I) **Ethanol**

**G sol = -154.997951 a.u**

**E sol = -155.052541 a.u**

|   |           |           |           |
|---|-----------|-----------|-----------|
| O | -1.246809 | -0.257881 | -0.111071 |
| C | -0.074979 | 0.560788  | 0.047628  |
| H | -0.122615 | 1.285922  | -0.770709 |
| H | -0.131829 | 1.118510  | 0.993834  |
| C | 1.218294  | -0.244733 | -0.021391 |
| H | 1.287652  | -0.785181 | -0.972470 |
| H | 1.269724  | -0.974756 | 0.796613  |
| H | 2.086547  | 0.420568  | 0.065160  |
| H | -1.274903 | -0.898343 | 0.618713  |

(J) **Int 3**

**E sol = -2027.084622 a.u**

**G sol = -2026.953351a.u**

|    |           |           |           |
|----|-----------|-----------|-----------|
| Cu | -0.622755 | -0.070248 | -0.286197 |
| O  | -2.569392 | -0.178755 | -0.478495 |
| C  | -3.418394 | 0.368470  | 0.581397  |
| C  | -4.856008 | -0.088662 | 0.414753  |
| H  | -3.328217 | 1.459543  | 0.570131  |

|   |           |           |           |
|---|-----------|-----------|-----------|
| H | -2.974587 | -0.011064 | 1.503388  |
| H | -5.461513 | 0.304075  | 1.239817  |
| H | -5.284384 | 0.283383  | -0.523688 |
| H | -4.920537 | -1.181813 | 0.423981  |
| H | -2.909798 | 0.104107  | -1.346090 |
| C | 1.261500  | -0.018201 | -0.072737 |
| C | 2.031344  | -1.196376 | 0.082252  |
| C | 1.985427  | 1.198385  | -0.051496 |
| C | 3.423607  | -1.168534 | 0.247540  |
| H | 1.532616  | -2.164467 | 0.074661  |
| C | 3.377431  | 1.241815  | 0.113047  |
| H | 1.450139  | 2.139810  | -0.165934 |
| C | 4.104528  | 0.054819  | 0.263897  |
| H | 3.976134  | -2.099606 | 0.363776  |
| H | 3.894064  | 2.200299  | 0.123774  |
| H | 5.184509  | 0.082664  | 0.391936  |

(K) Species C

**G sol = - 320.895928 a.u**

**E sol = - 320.961648 a.u**

|    |           |           |           |
|----|-----------|-----------|-----------|
| C  | -3.485625 | -1.211729 | 0.000164  |
| C  | -2.090102 | -1.216955 | 0.000096  |
| C  | -1.376876 | 0.000002  | 0.000063  |
| C  | -2.090106 | 1.216957  | 0.000099  |
| C  | -3.485629 | 1.211726  | 0.000167  |
| C  | -4.187388 | -0.000003 | 0.000200  |
| H  | -4.025826 | -2.154594 | 0.000189  |
| H  | -1.544390 | -2.156072 | 0.000068  |
| H  | -1.544397 | 2.156075  | 0.000073  |
| H  | -4.025834 | 2.154588  | 0.000194  |
| H  | -5.273955 | -0.000005 | 0.000252  |
| C  | 0.053649  | 0.000004  | -0.000008 |
| C  | 1.267191  | 0.000006  | -0.000067 |
| Br | 3.108106  | -0.000001 | -0.000144 |

(L) Species D

**G sol = -539.339639 a.u**

**E sol = -539.492110 a.u**

|   |          |           |          |
|---|----------|-----------|----------|
| C | 4.147912 | -1.211679 | 0.000000 |
| C | 2.752720 | -1.216838 | 0.000000 |
| C | 2.035881 | 0.000019  | 0.000001 |
| C | 2.752762 | 1.216851  | 0.000001 |

|   |           |           |           |
|---|-----------|-----------|-----------|
| C | 4.147954  | 1.211643  | 0.000001  |
| C | 4.850531  | -0.000030 | 0.000001  |
| H | 4.687978  | -2.154760 | 0.000000  |
| H | 2.207391  | -2.156339 | 0.000000  |
| H | 2.207467  | 2.156372  | 0.000001  |
| H | 4.688052  | 2.154706  | 0.000002  |
| H | 5.937118  | -0.000049 | 0.000001  |
| C | -2.752720 | -1.216838 | -0.000001 |
| C | -4.147912 | -1.211679 | -0.000001 |
| C | -4.850531 | -0.000030 | -0.000001 |
| C | -4.147954 | 1.211643  | 0.000000  |
| C | -2.752762 | 1.216851  | 0.000000  |
| C | -2.035881 | 0.000019  | -0.000001 |
| H | -2.207391 | -2.156339 | -0.000001 |
| H | -4.687978 | -2.154760 | -0.000002 |
| H | -5.937118 | -0.000049 | -0.000001 |
| H | -4.688052 | 2.154706  | 0.000000  |
| H | -2.207467 | 2.156372  | 0.000000  |
| C | 0.609156  | 0.000045  | 0.000000  |
| C | -0.609156 | 0.000045  | 0.000000  |

(M)  $\text{B(OH)}_2\text{K}_2\text{PO}_4$

**E sol = -875.560114 a.u**

**G sol = -875.551471 a.u**

|   |           |           |           |
|---|-----------|-----------|-----------|
| B | 1.732576  | 1.499907  | -0.294658 |
| O | -1.679384 | 0.724923  | 1.357404  |
| O | 0.522402  | 1.441377  | 0.309436  |
| P | -0.420042 | 0.072051  | 0.763638  |
| O | -0.687095 | -0.675406 | -0.566999 |
| O | 0.468720  | -0.715582 | 1.741373  |
| O | 2.456358  | 0.373602  | -0.655728 |
| H | 3.297621  | 0.609778  | -1.076188 |
| O | 2.308677  | 2.728422  | -0.585318 |
| H | 1.739928  | 3.460904  | -0.301924 |
| K | 1.574736  | -2.371017 | -0.319641 |
| K | -3.391432 | 0.072613  | -0.806912 |

(N)  $\text{Ph B(OH)}_2\text{K}_2\text{PO}_4$

**E sol = -1107.328026 a.u**

**G sol = -1107.234191 a.u**

|   |           |           |           |
|---|-----------|-----------|-----------|
| B | -0.222025 | 0.016437  | 0.893625  |
| O | 2.617883  | -0.090758 | 1.477643  |
| O | 0.736149  | 0.007924  | -0.274068 |
| P | 2.390386  | 0.001054  | -0.065670 |
| O | 2.881104  | -1.258609 | -0.830382 |
| O | 2.886062  | 1.341255  | -0.674287 |
| O | -0.012020 | 1.263707  | 1.696172  |
| H | 0.907392  | 1.194425  | 2.016216  |
| O | 0.007299  | -1.201483 | 1.727251  |
| H | 0.950497  | -1.126373 | 1.982410  |
| K | 0.520012  | 2.843588  | -0.711924 |
| K | 0.553845  | -2.845556 | -0.656417 |
| C | -1.751502 | 0.002826  | 0.328631  |
| C | -2.063525 | -0.049992 | -1.043268 |
| C | -2.843212 | 0.038185  | 1.219874  |
| C | -3.386891 | -0.067872 | -1.508216 |
| H | -1.246715 | -0.077034 | -1.762148 |
| C | -4.170756 | 0.021577  | 0.775007  |
| H | -2.646518 | 0.079425  | 2.289937  |
| C | -4.449182 | -0.031800 | -0.597908 |
| H | -3.588520 | -0.109853 | -2.577373 |
| H | -4.988187 | 0.050244  | 1.493631  |
| H | -5.478322 | -0.045285 | -0.950626 |

(O) Int 4

**E sol = -2348.069837 a.u**

**G sol = -2347.849674 a.u**

|    |           |           |           |
|----|-----------|-----------|-----------|
| C  | -0.640622 | 4.683861  | 0.129397  |
| C  | -1.097928 | 3.377946  | -0.050866 |
| C  | -0.218087 | 2.289215  | 0.127210  |
| C  | 1.118983  | 2.534121  | 0.485291  |
| C  | 1.568523  | 3.843467  | 0.664483  |
| C  | 0.692755  | 4.921250  | 0.488016  |
| H  | -1.324613 | 5.516738  | -0.010640 |
| H  | -2.131150 | 3.191957  | -0.330194 |
| H  | 1.789592  | 1.690627  | 0.608204  |
| H  | 2.604221  | 4.022534  | 0.940994  |
| H  | 1.046054  | 5.939606  | 0.626190  |
| C  | -0.728663 | 0.949330  | -0.048640 |
| C  | -1.615336 | 0.054708  | -0.198828 |
| Br | -3.492969 | -0.280374 | -0.237615 |
| Cu | 0.109058  | -0.807260 | -0.250272 |
| O  | -0.125889 | -2.818199 | -0.504630 |
| C  | -1.268830 | -3.505497 | 0.084717  |
| H  | -2.134193 | -3.081475 | -0.427610 |
| H  | -1.191336 | -4.567250 | -0.170588 |
| C  | -1.345804 | -3.281865 | 1.585324  |



|   |           |           |           |
|---|-----------|-----------|-----------|
| H | -1.415103 | -2.210070 | 1.805027  |
| H | -2.235006 | -3.777539 | 1.992141  |
| H | -0.462035 | -3.687765 | 2.091093  |
| H | 0.701656  | -3.261364 | -0.244765 |
| C | 2.065761  | -0.819561 | -0.192790 |
| C | 2.728543  | -1.592002 | 0.785892  |
| C | 2.888319  | -0.179848 | -1.144748 |
| C | 4.125386  | -1.725714 | 0.816994  |
| H | 2.144930  | -2.099033 | 1.555360  |
| C | 4.284071  | -0.306900 | -1.132048 |
| H | 2.429781  | 0.441069  | -1.913668 |
| C | 4.909636  | -1.082525 | -0.146891 |
| H | 4.598370  | -2.328080 | 1.590908  |
| H | 4.884108  | 0.200133  | -1.886026 |
| H | 5.992826  | -1.180803 | -0.130032 |

(P) TS 2

**E sol = -2348.034885 a.u**

**G sol = -2347.818744 a.u**

|    |           |           |           |
|----|-----------|-----------|-----------|
| Cu | 0.481684  | -0.939126 | -0.351322 |
| O  | -1.079107 | -1.894770 | -1.156344 |
| C  | -2.378576 | -1.828695 | -0.480109 |
| H  | -2.468210 | -0.784198 | -0.181379 |
| H  | -2.328633 | -2.450609 | 0.419271  |
| C  | 2.253958  | -0.319726 | -0.016547 |
| C  | 2.742239  | 0.795561  | -0.709082 |
| C  | 3.111342  | -1.081244 | 0.788948  |
| C  | 4.110010  | 1.099414  | -0.661178 |
| H  | 2.063899  | 1.421700  | -1.282084 |
| C  | 4.477805  | -0.777428 | 0.832285  |
| H  | 2.719874  | -1.907059 | 1.378502  |
| C  | 4.977110  | 0.312077  | 0.106014  |
| H  | 4.492900  | 1.954617  | -1.213444 |
| H  | 5.147327  | -1.381646 | 1.440212  |
| H  | 6.035394  | 0.556272  | 0.152133  |
| C  | -0.008787 | 0.052736  | 1.204710  |
| C  | -0.174422 | -0.101883 | 2.415627  |
| C  | -0.360935 | -0.306233 | 3.807604  |
| C  | 0.548536  | 0.239037  | 4.745368  |
| C  | -1.458270 | -1.058764 | 4.290446  |
| C  | 0.357432  | 0.042669  | 6.113258  |
| H  | 1.397013  | 0.816094  | 4.388301  |
| C  | -1.633474 | -1.255990 | 5.660117  |
| H  | -2.163263 | -1.483370 | 3.581013  |
| C  | -0.730738 | -0.706197 | 6.580154  |
| H  | 1.063860  | 0.473419  | 6.818544  |
| H  | -2.481114 | -1.838850 | 6.011955  |
| H  | -0.873400 | -0.859548 | 7.646383  |

|    |           |           |           |
|----|-----------|-----------|-----------|
| Br | -0.841208 | 1.742845  | -0.144576 |
| C  | -3.492957 | -2.254233 | -1.416420 |
| H  | -3.371088 | -3.296724 | -1.733977 |
| H  | -4.454964 | -2.170486 | -0.897426 |
| H  | -3.519347 | -1.614628 | -2.304934 |
| H  | -0.907520 | -2.810901 | -1.438229 |

(Q) Int 4'

**E sol = -2348.069163 a.u**

**G sol = -2347.849781 a.u**

|    |           |           |           |
|----|-----------|-----------|-----------|
| C  | 0.481684  | -0.939126 | -0.351322 |
| C  | -1.079107 | -1.894770 | -1.156344 |
| C  | -2.378576 | -1.828695 | -0.480109 |
| C  | -2.468210 | -0.784198 | -0.181379 |
| C  | -2.328633 | -2.450609 | 0.419271  |
| C  | 2.253958  | -0.319726 | -0.016547 |
| H  | 2.742239  | 0.795561  | -0.709082 |
| H  | 3.111342  | -1.081244 | 0.788948  |
| H  | 4.110010  | 1.099414  | -0.661178 |
| H  | 2.063899  | 1.421700  | -1.282084 |
| H  | 4.477805  | -0.777428 | 0.832285  |
| C  | 2.719874  | -1.907059 | 1.378502  |
| C  | 4.977110  | 0.312077  | 0.106014  |
| Br | 4.492900  | 1.954617  | -1.213444 |
| Cu | 5.147327  | -1.381646 | 1.440212  |
| O  | 6.035394  | 0.556272  | 0.152133  |
| C  | -0.008787 | 0.052736  | 1.204710  |
| H  | -0.174422 | -0.101883 | 2.415627  |
| H  | -0.360935 | -0.306233 | 3.807604  |
| C  | 0.548536  | 0.239037  | 4.745368  |
| H  | -1.458270 | -1.058764 | 4.290446  |
| H  | 0.357432  | 0.042669  | 6.113258  |
| H  | 1.397013  | 0.816094  | 4.388301  |
| H  | -1.633474 | -1.255990 | 5.660117  |
| C  | -2.163263 | -1.483370 | 3.581013  |
| C  | -0.730738 | -0.706197 | 6.580154  |
| C  | 1.063860  | 0.473419  | 6.818544  |
| C  | -2.481114 | -1.838850 | 6.011955  |
| H  | -0.873400 | -0.859548 | 7.646383  |
| C  | -0.841208 | 1.742845  | -0.144576 |
| H  | -3.492957 | -2.254233 | -1.416420 |
| C  | -3.371088 | -3.296724 | -1.733977 |
| H  | -4.454964 | -2.170486 | -0.897426 |
| H  | -3.519347 | -1.614628 | -2.304934 |
| H  | -0.907520 | -2.810901 | -1.438229 |

(R) TS 2'

E sol = -2348.036015

G sol = -2347.817849

|    |           |           |           |
|----|-----------|-----------|-----------|
| C  | -1.460886 | 0.755682  | 0.144505  |
| C  | 5.034377  | 0.862547  | 0.509279  |
| C  | 5.578149  | 0.293198  | -0.650464 |
| C  | 4.753107  | -0.401842 | -1.545394 |
| C  | 3.390597  | -0.532480 | -1.287518 |
| C  | 2.832142  | 0.038625  | -0.118495 |
| H  | 3.673389  | 0.741202  | 0.778510  |
| H  | 5.673987  | 1.402021  | 1.202143  |
| H  | 6.640201  | 0.392126  | -0.856779 |
| H  | 5.175150  | -0.842385 | -2.444290 |
| H  | 2.746718  | -1.069788 | -1.977211 |
| C  | 3.245226  | 1.182651  | 1.673510  |
| C  | 1.453512  | -0.097040 | 0.159729  |
| Br | 0.235742  | -0.140092 | 0.381477  |
| Cu | -1.079225 | -1.482157 | 1.330174  |
| O  | -0.497880 | 2.649279  | -0.282664 |
| C  | -0.758135 | 3.692124  | 0.695841  |
| H  | -0.246010 | 4.604707  | 0.370123  |
| H  | -1.836058 | 3.852729  | 0.639242  |
| C  | -0.333116 | 3.276111  | 2.096115  |
| H  | -0.866276 | 2.368220  | 2.403597  |
| H  | 0.744049  | 3.076618  | 2.140904  |
| H  | -0.565814 | 4.073857  | 2.811292  |
| H  | 0.460122  | 2.472530  | -0.312866 |
| C  | -3.355255 | 1.212512  | -0.032468 |
| C  | -3.805064 | 2.321803  | -0.783265 |
| C  | -4.360524 | 0.434402  | 0.582217  |
| C  | -5.164946 | 2.636198  | -0.919876 |
| H  | -3.073113 | 2.958326  | -1.280048 |
| C  | -5.725376 | 0.734535  | 0.461994  |
| H  | -4.071215 | -0.435894 | 1.173283  |
| C  | -6.133057 | 1.841221  | -0.293241 |
| H  | -5.469891 | 3.498518  | -1.510984 |
| H  | -6.468540 | 0.108656  | 0.953951  |
| H  | -7.189746 | 2.080553  | -0.392372 |

(S) Int 6

E sol = - 2660.269728a.u

G sol = - 2660.205489a.u

|   |           |           |           |
|---|-----------|-----------|-----------|
| O | -1.641901 | 0.865341  | -0.618790 |
| O | -3.159768 | -1.032002 | -1.621458 |
| P | -2.319456 | -0.592240 | -0.404411 |
| O | -3.156602 | -0.571950 | 0.905239  |
| O | -0.977849 | -1.466776 | -0.240783 |
| K | -5.574666 | -1.429237 | -0.194920 |

|    |           |           |           |
|----|-----------|-----------|-----------|
| K  | -2.511780 | 2.014804  | 1.811889  |
| Cu | 0.148083  | 0.129474  | -0.353057 |
| C  | 2.077727  | -0.064840 | -0.107023 |
| C  | 2.896022  | -1.228465 | 0.126685  |
| C  | 4.288039  | -1.088722 | 0.304444  |
| C  | 2.312953  | -2.509124 | 0.178172  |
| C  | 5.078260  | -2.216824 | 0.528763  |
| H  | 4.737663  | -0.100514 | 0.265858  |
| C  | 3.112428  | -3.631664 | 0.400648  |
| H  | 1.238063  | -2.597430 | 0.043010  |
| C  | 4.494378  | -3.489772 | 0.576268  |
| H  | 6.150447  | -2.103631 | 0.665794  |
| H  | 2.657554  | -4.617990 | 0.437680  |
| H  | 5.114186  | -4.365411 | 0.749662  |
| C  | 1.747015  | 1.143543  | -0.282726 |
| Br | 2.276858  | 2.969896  | -0.409276 |

(T) TS4

**E sol = -2660.236019 a.u**

**G sol = -2660.172795 a.u**

|    |           |           |           |
|----|-----------|-----------|-----------|
| C  | 4.926967  | 0.487993  | 0.880620  |
| C  | 5.579839  | 0.331154  | -0.350397 |
| C  | 4.837720  | 0.083418  | -1.513882 |
| C  | 3.449584  | -0.003026 | -1.455111 |
| C  | 2.779295  | 0.144299  | -0.214082 |
| C  | 3.540383  | 0.392307  | 0.956406  |
| H  | 5.503311  | 0.681694  | 1.780887  |
| H  | 6.662583  | 0.403109  | -0.402931 |
| H  | 5.344779  | -0.037238 | -2.467047 |
| H  | 2.868358  | -0.187444 | -2.353508 |
| H  | 3.029278  | 0.509010  | 1.907245  |
| C  | 1.377480  | 0.031601  | -0.145749 |
| C  | 0.133549  | 0.000336  | -0.111220 |
| Br | -1.191957 | -1.593747 | 0.273640  |
| O  | -3.068865 | 2.023069  | 0.040969  |
| Cu | -1.383648 | 1.097563  | -0.128915 |
| O  | -1.759312 | 1.781249  | -2.045028 |
| P  | -3.216708 | 2.278152  | -1.558832 |
| O  | -3.467941 | 3.760075  | -1.877402 |
| O  | -4.294070 | 1.300760  | -2.114370 |
| K  | -5.051762 | -0.010110 | 0.282500  |
| K  | -2.495632 | -0.526769 | -3.446785 |

(U) Int 8

**E sol = - 2660.274885a.u**

**G solv = -2660.211825a.u**

|    |           |           |           |
|----|-----------|-----------|-----------|
| O  | -1.986037 | 0.610964  | -0.681657 |
| O  | -3.023847 | -1.668890 | -1.490238 |
| P  | -2.342223 | -0.937926 | -0.339384 |
| O  | -3.083745 | -1.007691 | 1.002266  |
| O  | -0.773200 | -1.367077 | -0.190119 |
| K  | -5.316737 | -2.519664 | 0.108023  |
| K  | -2.961092 | 1.820485  | 1.761459  |
| Cu | -0.142867 | 0.382982  | -0.427775 |
| Br | 0.325660  | 2.718536  | -0.550482 |
| C  | 1.653062  | -0.056061 | -0.187833 |
| C  | 2.819277  | -0.390616 | -0.031059 |
| C  | 4.184579  | -0.784551 | 0.146808  |
| C  | 5.195694  | 0.185474  | 0.316714  |
| C  | 4.544997  | -2.149126 | 0.154575  |
| C  | 6.526216  | -0.201126 | 0.487750  |
| H  | 4.927533  | 1.238268  | 0.312369  |
| C  | 5.877727  | -2.528507 | 0.324194  |
| H  | 3.773258  | -2.902732 | 0.025303  |
| C  | 6.873084  | -1.557823 | 0.491488  |
| H  | 7.293678  | 0.557603  | 0.617438  |
| H  | 6.139763  | -3.583425 | 0.326381  |
| H  | 7.909726  | -1.856080 | 0.623616  |

(V) TS 5

**E sol = -3068.574247 a.u**

**G sol = -3068.396230 a.u**

|    |           |           |           |
|----|-----------|-----------|-----------|
| Cu | 0.481684  | -0.939126 | -0.351322 |
| O  | -1.079107 | -1.894770 | -1.156344 |
| C  | -2.378576 | -1.828695 | -0.480109 |
| H  | -2.468210 | -0.784198 | -0.181379 |
| H  | -2.328633 | -2.450609 | 0.419271  |
| C  | 2.253958  | -0.319726 | -0.016547 |
| C  | 2.742239  | 0.795561  | -0.709082 |
| C  | 3.111342  | -1.081244 | 0.788948  |
| C  | 4.110010  | 1.099414  | -0.661178 |
| H  | 2.063899  | 1.421700  | -1.282084 |
| C  | 4.477805  | -0.777428 | 0.832285  |
| H  | 2.719874  | -1.907059 | 1.378502  |
| C  | 4.977110  | 0.312077  | 0.106014  |
| H  | 4.492900  | 1.954617  | -1.213444 |
| H  | 5.147327  | -1.381646 | 1.440212  |
| H  | 6.035394  | 0.556272  | 0.152133  |

|    |           |           |           |
|----|-----------|-----------|-----------|
| C  | -0.008787 | 0.052736  | 1.204710  |
| C  | -0.174422 | -0.101883 | 2.415627  |
| C  | -0.360935 | -0.306233 | 3.807604  |
| C  | 0.548536  | 0.239037  | 4.745368  |
| C  | -1.458270 | -1.058764 | 4.290446  |
| C  | 0.357432  | 0.042669  | 6.113258  |
| H  | 1.397013  | 0.816094  | 4.388301  |
| C  | -1.633474 | -1.255990 | 5.660117  |
| H  | -2.163263 | -1.483370 | 3.581013  |
| C  | -0.730738 | -0.706197 | 6.580154  |
| H  | 1.063860  | 0.473419  | 6.818544  |
| H  | -2.481114 | -1.838850 | 6.011955  |
| H  | -0.873400 | -0.859548 | 7.646383  |
| Br | -0.841208 | 1.742845  | -0.144576 |
| C  | -3.492957 | -2.254233 | -1.416420 |
| H  | -3.371088 | -3.296724 | -1.733977 |
| H  | -4.454964 | -2.170486 | -0.897426 |
| H  | -3.519347 | -1.614628 | -2.304934 |
| H  | -0.907520 | -2.810901 | -1.438229 |

(W) Int 9

**E sol = -2127.878860 a.u**

**G sol = -2127.744933 a.u**

|    |           |           |           |
|----|-----------|-----------|-----------|
| C  | 4.403054  | -0.293201 | -1.452713 |
| C  | 3.090384  | 0.175066  | -1.419782 |
| C  | 2.522047  | 0.583497  | -0.195896 |
| C  | 3.282720  | 0.513241  | 0.988684  |
| C  | 4.594112  | 0.040998  | 0.943295  |
| C  | 5.155819  | -0.365232 | -0.273419 |
| H  | 4.837360  | -0.608929 | -2.396944 |
| H  | 2.494112  | 0.217478  | -2.326077 |
| H  | 2.837946  | 0.819556  | 1.930418  |
| H  | 5.176518  | -0.014759 | 1.858499  |
| H  | 6.175665  | -0.738244 | -0.302588 |
| C  | 1.163719  | 1.037519  | -0.147369 |
| C  | 0.043150  | 1.579835  | -0.065299 |
| Br | -1.021886 | 3.122950  | 0.047799  |
| I  | -2.937326 | -0.894853 | -0.273035 |
| Cu | -0.412220 | -0.310308 | -0.213151 |
| O  | 0.340446  | -2.213668 | -0.392422 |
| C  | 1.461309  | -2.682101 | 0.417482  |
| C  | 1.231630  | -2.416820 | 1.895181  |
| H  | 2.324474  | -2.132900 | 0.040097  |
| H  | 1.604513  | -3.746305 | 0.206841  |
| H  | 2.109029  | -2.731144 | 2.472259  |
| H  | 1.071570  | -1.346219 | 2.069493  |
| H  | 0.357473  | -2.964631 | 2.264366  |
| H  | -0.411898 | -2.824482 | -0.294546 |

(X) TS 4'

E sol = -2127.836376a.u

G sol = -2127.704623a.u

|    |           |           |           |
|----|-----------|-----------|-----------|
| Br | 0.350632  | -2.323428 | -0.047363 |
| O  | 0.834409  | 2.056433  | -0.270456 |
| H  | 1.733390  | 2.411749  | -0.136223 |
| Cu | 0.877331  | 0.026924  | -0.057210 |
| I  | 3.493079  | 0.070570  | 0.052886  |
| C  | -3.624255 | -0.139225 | 0.002013  |
| C  | -4.356024 | -0.042404 | -1.205997 |
| C  | -4.316991 | -0.130952 | 1.236745  |
| C  | -5.744777 | 0.054016  | -1.173134 |
| H  | -3.824028 | -0.045227 | -2.152455 |
| C  | -5.705906 | -0.033603 | 1.255345  |
| H  | -3.754966 | -0.202557 | 2.162935  |
| C  | -6.422564 | 0.058995  | 0.054030  |
| H  | -6.301931 | 0.126545  | -2.102774 |
| H  | -6.232898 | -0.029429 | 2.205189  |
| H  | -7.506039 | 0.135977  | 0.074236  |
| C  | -2.213973 | -0.255047 | -0.023272 |
| C  | -0.981105 | -0.237942 | -0.036437 |
| C  | -0.142567 | 2.898821  | 0.415688  |
| C  | -0.173691 | 4.284232  | -0.205112 |
| H  | 0.110238  | 2.926782  | 1.480780  |
| H  | -1.089384 | 2.373464  | 0.291454  |
| H  | -0.934643 | 4.890681  | 0.300223  |
| H  | 0.791899  | 4.791761  | -0.095457 |
| H  | -0.423689 | 4.226427  | -1.269642 |

(Y) Int 10

E sol = -2127.836962 a.u

G sol = -2127.706181 a.u

|    |           |           |           |
|----|-----------|-----------|-----------|
| Cu | -0.816890 | 0.038675  | -0.058347 |
| Br | -0.414316 | -2.290857 | 0.062252  |
| C  | 1.059518  | 0.025593  | -0.017130 |
| C  | 2.285461  | -0.088804 | -0.029925 |
| C  | 3.704431  | -0.051810 | -0.030620 |
| C  | 4.421858  | -0.140970 | 1.185696  |
| C  | 4.417065  | 0.063272  | -1.247526 |
| C  | 5.814712  | -0.118774 | 1.178362  |
| H  | 3.875911  | -0.227990 | 2.120250  |
| C  | 5.809931  | 0.084127  | -1.242045 |
| H  | 3.867412  | 0.134875  | -2.181217 |
| C  | 6.512155  | -0.005989 | -0.032258 |
| H  | 6.359351  | -0.189256 | 2.115692  |
| H  | 6.350922  | 0.172174  | -2.180004 |

|   |           |           |           |
|---|-----------|-----------|-----------|
| H | 7.598436  | 0.012775  | -0.032806 |
| O | -0.913398 | 2.034026  | -0.322976 |
| I | -3.435364 | -0.024128 | -0.025516 |
| C | -0.173378 | 2.935927  | 0.566315  |
| H | -0.605896 | 2.860008  | 1.568942  |
| H | 0.837371  | 2.529529  | 0.581442  |
| H | -1.851128 | 2.307269  | -0.351609 |
| C | -0.217435 | 4.352045  | 0.022833  |
| H | -1.243901 | 4.735303  | -0.011446 |
| H | 0.212056  | 4.396153  | -0.983237 |
| H | 0.365918  | 5.006488  | 0.681196  |

(Z) TS 5

**E sol = -3068.574247 a.u**

**G sol = -3068.396230 a.u**

|    |           |           |           |
|----|-----------|-----------|-----------|
| O  | 1.539146  | 1.172701  | -1.115600 |
| O  | 1.291864  | -0.566628 | 0.833263  |
| P  | 1.441601  | 1.143824  | 0.409016  |
| O  | 0.048203  | 1.566599  | 0.973354  |
| O  | 2.648561  | 1.582844  | 1.218626  |
| K  | 3.424209  | -1.366896 | 2.399188  |
| K  | -2.346425 | 2.745238  | 0.528198  |
| C  | -0.758096 | -1.650731 | -0.207536 |
| C  | -1.505351 | -2.807774 | 0.148621  |
| C  | -1.349153 | -0.732407 | -1.124273 |
| C  | -2.724597 | -3.088907 | -0.458661 |
| H  | -1.081072 | -3.487781 | 0.880617  |
| C  | -2.569423 | -1.007029 | -1.725569 |
| H  | -0.808076 | 0.177558  | -1.367594 |
| C  | -3.257725 | -2.184980 | -1.389100 |
| H  | -3.272550 | -3.990950 | -0.201144 |
| H  | -2.999375 | -0.311822 | -2.441362 |
| H  | -4.221769 | -2.391942 | -1.846669 |
| O  | 1.593296  | -1.562245 | -1.408088 |
| O  | 1.429158  | -2.911731 | 0.575995  |
| H  | 1.671564  | -3.602647 | -0.057365 |
| H  | 1.600316  | -0.603005 | -1.626563 |
| B  | 1.019413  | -1.720106 | -0.119345 |
| Cu | -0.468529 | -0.503102 | 1.539826  |
| Br | 0.134800  | -0.686245 | 3.956279  |
| C  | -2.268823 | -0.404930 | 1.927866  |
| C  | -3.476536 | -0.290753 | 2.072705  |
| C  | -4.894849 | -0.127784 | 2.165052  |
| C  | -5.675495 | -0.087495 | 0.989469  |
| C  | -5.535831 | -0.000234 | 3.414977  |
| C  | -7.059261 | 0.077035  | 1.066463  |
| H  | -5.184811 | -0.188249 | 0.025554  |
| C  | -6.920772 | 0.162201  | 3.483647  |
| H  | -4.941000 | -0.029390 | 4.323496  |



|   |           |          |          |
|---|-----------|----------|----------|
| C | -7.687085 | 0.202172 | 2.312139 |
| H | -7.648792 | 0.106309 | 0.153777 |
| H | -7.402866 | 0.258069 | 4.453020 |
| H | -8.764780 | 0.329459 | 2.369435 |

(AA) Int 7

**E sol = -3068.602849a.u**

**G sol = -3068.422923a.u**

|    |           |           |           |
|----|-----------|-----------|-----------|
| O  | -3.278908 | 0.085940  | 1.152987  |
| O  | -1.326608 | -0.728254 | -0.384357 |
| P  | -2.730660 | 0.193403  | -0.279034 |
| O  | -2.032975 | 1.603432  | -0.526393 |
| O  | -3.667286 | -0.242081 | -1.405008 |
| K  | -2.769656 | -2.787970 | -2.187399 |
| K  | -2.562503 | 2.757486  | 2.015069  |
| Cu | -0.193316 | 0.899728  | -0.645513 |
| C  | 0.080332  | -1.698244 | 1.564497  |
| C  | 1.096025  | -2.598036 | 1.938394  |
| C  | 0.024549  | -0.485284 | 2.277745  |
| C  | 2.015429  | -2.303941 | 2.953088  |
| H  | 1.180912  | -3.547841 | 1.412851  |
| C  | 0.934518  | -0.171728 | 3.292931  |
| H  | -0.757183 | 0.226007  | 2.027201  |
| C  | 1.940978  | -1.084162 | 3.634728  |
| H  | 2.796788  | -3.019120 | 3.203180  |
| H  | 0.862634  | 0.781225  | 3.814294  |
| H  | 2.657481  | -0.845888 | 4.417777  |
| O  | -2.261749 | -2.618447 | 0.875233  |
| O  | -0.479380 | -3.027295 | -0.583530 |
| H  | 0.442795  | -2.829872 | -0.801927 |
| B  | -0.996123 | -2.068272 | 0.395559  |
| H  | -2.756771 | -1.902012 | 1.316834  |
| C  | 1.374378  | 1.969689  | -0.798907 |
| C  | 1.780949  | 0.782708  | -0.853065 |
| C  | 2.562331  | -0.424053 | -0.878714 |
| C  | 2.274558  | -1.437844 | -1.814084 |
| C  | 3.611624  | -0.602857 | 0.041194  |
| C  | 3.033502  | -2.607818 | -1.831018 |
| H  | 1.458437  | -1.295506 | -2.516800 |
| C  | 4.363399  | -1.778042 | 0.018725  |
| H  | 3.817310  | 0.169762  | 0.775309  |
| C  | 4.078090  | -2.781735 | -0.913071 |
| H  | 2.808466  | -3.385112 | -2.556097 |
| H  | 5.166341  | -1.914258 | 0.737730  |
| H  | 4.662925  | -3.697288 | -0.922987 |
| Br | 1.710539  | 3.826543  | -0.900902 |

(BB) TS 3

**E sol = -3068.570103 a.u**

**G sol = -3068.390491 a.u**

|    |           |           |           |
|----|-----------|-----------|-----------|
| O  | -2.609345 | -1.908999 | 1.675794  |
| O  | -1.843136 | -0.547661 | -0.391826 |
| P  | -2.849711 | -0.515237 | 1.046468  |
| O  | -2.241472 | 0.639126  | 1.852380  |
| O  | -4.241093 | -0.266508 | 0.449869  |
| K  | -3.390511 | 0.943892  | -2.154874 |
| K  | -0.395603 | -0.358559 | 3.557751  |
| C  | 0.534609  | -1.969681 | -0.655784 |
| C  | 1.426773  | -2.212716 | -1.721944 |
| C  | 0.792639  | -2.663978 | 0.549185  |
| C  | 2.505505  | -3.097564 | -1.606179 |
| H  | 1.264357  | -1.696745 | -2.666989 |
| C  | 1.869888  | -3.544161 | 0.689281  |
| H  | 0.103123  | -2.531824 | 1.381209  |
| C  | 2.732795  | -3.761507 | -0.394332 |
| H  | 3.173062  | -3.263292 | -2.449424 |
| H  | 2.039195  | -4.061390 | 1.631647  |
| H  | 3.573558  | -4.444096 | -0.294411 |
| O  | -2.010091 | -2.972940 | -0.738707 |
| O  | -1.470421 | -1.454159 | -2.534013 |
| H  | -1.334275 | -2.256525 | -3.058165 |
| H  | -2.234553 | -2.886477 | 0.222947  |
| B  | -1.464713 | -1.746800 | -1.137966 |
| Cu | 0.044403  | 0.015012  | -0.330365 |
| C  | 1.533293  | 1.300875  | -0.136574 |
| C  | 0.416685  | 1.884091  | -0.168049 |
| Br | -0.653440 | 3.435061  | -0.109463 |
| C  | 2.966849  | 1.149306  | -0.073658 |
| C  | 3.783195  | 2.282540  | -0.271680 |
| C  | 3.561734  | -0.095031 | 0.199443  |
| C  | 5.171333  | 2.164066  | -0.198085 |
| H  | 3.323567  | 3.243643  | -0.483879 |
| C  | 4.951281  | -0.203852 | 0.272849  |
| H  | 2.930708  | -0.964018 | 0.345489  |
| C  | 5.759390  | 0.921789  | 0.074658  |
| H  | 5.794640  | 3.040553  | -0.353678 |
| H  | 5.402351  | -1.170018 | 0.482451  |
| H  | 6.841028  | 0.832995  | 0.129964  |

(CC) Int 4

**E sol = -2348.069837**

**G sol = -2347.849674**

|    |           |           |           |
|----|-----------|-----------|-----------|
| C  | -0.640621 | 4.683861  | 0.129397  |
| C  | -1.097927 | 3.377946  | -0.050866 |
| C  | -0.218086 | 2.289215  | 0.127210  |
| C  | 1.118984  | 2.534121  | 0.485291  |
| C  | 1.568524  | 3.843467  | 0.664483  |
| C  | 0.692756  | 4.921250  | 0.488016  |
| H  | -1.324612 | 5.516738  | -0.010640 |
| H  | -2.131149 | 3.191958  | -0.330194 |
| H  | 1.789592  | 1.690627  | 0.608204  |
| H  | 2.604222  | 4.022533  | 0.940994  |
| H  | 1.046056  | 5.939606  | 0.626190  |
| C  | -0.728663 | 0.949330  | -0.048640 |
| C  | -1.615336 | 0.054709  | -0.198828 |
| Br | -3.492969 | -0.280373 | -0.237615 |
| Cu | 0.109058  | -0.807260 | -0.250272 |
| O  | -0.125890 | -2.818199 | -0.504630 |
| C  | -1.268831 | -3.505497 | 0.084717  |
| H  | -2.134194 | -3.081474 | -0.427610 |
| H  | -1.191337 | -4.567250 | -0.170588 |
| C  | -1.345805 | -3.281865 | 1.585324  |
| H  | -1.415104 | -2.210070 | 1.805027  |
| H  | -2.235007 | -3.777538 | 1.992141  |
| H  | -0.462036 | -3.687765 | 2.091093  |
| H  | 0.701655  | -3.261364 | -0.244765 |
| C  | 2.065761  | -0.819561 | -0.192790 |
| C  | 2.728543  | -1.592003 | 0.785892  |
| C  | 2.888319  | -0.179849 | -1.144748 |
| C  | 4.125386  | -1.725715 | 0.816994  |
| H  | 2.144929  | -2.099033 | 1.555360  |
| C  | 4.284071  | -0.306901 | -1.132048 |
| H  | 2.429781  | 0.441068  | -1.913668 |
| C  | 4.909636  | -1.082526 | -0.146891 |
| H  | 4.598369  | -2.328081 | 1.590908  |
| H  | 4.884108  | 0.200132  | -1.886026 |
| H  | 5.992826  | -1.180804 | -0.130032 |

(DD) Int 5

**E sol = -2348.073669**

**G sol = -2347.856279**

|    |          |          |          |
|----|----------|----------|----------|
| Cu | -0.65073 | -0.19711 | -0.06316 |
| Br | -1.05284 | -2.51784 | -0.06668 |
| C  | -2.58011 | -0.17039 | -0.01619 |
| C  | -3.19116 | -0.09035 | 1.22946  |
| C  | -3.24222 | 0.08577  | -1.21091 |
| C  | -4.52191 | 0.35151  | 1.28046  |
| H  | -2.65435 | -0.34033 | 2.13954  |
| C  | -4.57304 | 0.52409  | -1.14093 |

|   |          |          |          |
|---|----------|----------|----------|
| H | -2.74185 | -0.01845 | -2.16895 |
| C | -5.20778 | 0.6579   | 0.09987  |
| H | -5.0153  | 0.44559  | 2.24438  |
| H | -5.10625 | 0.75647  | -2.05917 |
| H | -6.24097 | 0.99084  | 0.14518  |
| C | 1.29818  | -0.14993 | -0.03378 |
| C | 2.52406  | -0.04415 | -0.0125  |
| C | 3.95172  | 0.07135  | 0.01148  |
| C | 4.67393  | 0.33077  | -1.1739  |
| C | 4.66745  | -0.07064 | 1.2204   |
| C | 6.06532  | 0.44257  | -1.14776 |
| H | 4.13422  | 0.44231  | -2.11024 |
| C | 6.05887  | 0.04301  | 1.23932  |
| H | 4.12293  | -0.27016 | 2.13918  |
| C | 6.76431  | 0.29977  | 0.05721  |
| H | 6.60502  | 0.64158  | -2.07017 |
| H | 6.59365  | -0.06939 | 2.17905  |
| H | 7.84738  | 0.38729  | 0.0748   |
| O | -0.63614 | 1.81862  | -0.27594 |
| C | -1.50886 | 2.77584  | 0.40382  |
| C | -1.15756 | 4.19195  | -0.01667 |
| H | -1.41312 | 2.62799  | 1.484    |
| H | -2.51711 | 2.50096  | 0.09684  |
| H | -1.8466  | 4.8932   | 0.4682   |
| H | -0.13757 | 4.45809  | 0.28513  |
| H | -1.24784 | 4.30844  | -1.10174 |
| H | 0.3002   | 2.0428   | -0.10938 |

(EE) C<sub>A</sub>

**E sol = -91.157327**

**G sol = -91.142111**

|    |           |           |           |
|----|-----------|-----------|-----------|
| C  | -0.845625 | 1.158004  | -0.024415 |
| C  | -1.797814 | 0.247505  | -0.183883 |
| Br | -2.679821 | -0.644063 | 1.327785  |
| H  | -0.399686 | 1.612302  | -0.906767 |
| H  | -0.485181 | 1.476360  | 0.948900  |
| H  | -2.190331 | -0.102396 | -1.131325 |

(FF) Int 7A

|    |           |           |           |
|----|-----------|-----------|-----------|
| O  | 1.904670  | -0.987185 | 1.991210  |
| O  | 1.154945  | -0.418666 | -0.444566 |
| P  | 1.218742  | -1.596545 | 0.753337  |
| O  | -0.349353 | -1.730250 | 0.973992  |
| O  | 1.881686  | -2.838521 | 0.157633  |
| K  | 3.555960  | -1.835732 | -1.893780 |
| K  | -0.429979 | -0.743480 | 3.646717  |
| Cu | -0.850091 | -0.235694 | -0.239245 |

**E sol = -2838.788888**

**G sol = -2838.659878**

|    |           |           |           |
|----|-----------|-----------|-----------|
| C  | 1.314123  | 2.114138  | -0.182387 |
| C  | 1.057805  | 3.214345  | -1.018733 |
| C  | 0.757907  | 2.164450  | 1.113289  |
| C  | 0.263301  | 4.294465  | -0.605534 |
| H  | 1.473491  | 3.227873  | -2.025135 |
| C  | -0.036298 | 3.231551  | 1.543140  |
| H  | 0.946483  | 1.331264  | 1.786335  |
| C  | -0.295157 | 4.303556  | 0.677220  |
| H  | 0.074201  | 5.122507  | -1.286014 |
| H  | -0.460182 | 3.227490  | 2.545699  |
| H  | -0.920253 | 5.133115  | 0.999572  |
| O  | 3.377669  | 0.521822  | 0.070834  |
| O  | 2.510526  | 0.803008  | -2.084898 |
| H  | 1.732328  | 0.991381  | -2.628747 |
| B  | 2.149402  | 0.794146  | -0.664504 |
| H  | 3.132777  | 0.192098  | 0.958652  |
| C  | -2.722661 | 0.407102  | -0.372741 |
| C  | -1.932181 | 1.158058  | -1.221076 |
| Br | -3.929548 | -1.010288 | -1.058412 |
| H  | -3.053583 | 0.744367  | 0.605913  |
| H  | -1.554824 | 2.122460  | -0.880499 |
| H  | -1.887611 | 0.957460  | -2.289267 |

(GG) Int 6A

**E sol = -2430.457351**

**G sol = -2430.444060**

|    |           |           |           |
|----|-----------|-----------|-----------|
| O  | -3.216102 | 0.836474  | 0.125817  |
| O  | -1.392405 | -0.844491 | 0.980790  |
| P  | -2.061844 | -0.101744 | -0.296257 |
| O  | -0.793354 | 0.788484  | -0.766425 |
| O  | -2.446477 | -1.160753 | -1.354753 |
| K  | -1.379079 | -3.446016 | -0.097832 |
| K  | -1.853603 | 3.301160  | -0.112344 |
| Cu | 0.329521  | 0.055880  | 0.686821  |
| C  | 2.197693  | 0.624424  | 0.862550  |
| C  | 1.909680  | -0.294180 | 1.866252  |
| Br | 3.278908  | 0.093916  | -0.726181 |
| H  | 2.281683  | 1.695515  | 1.025719  |
| H  | 1.689089  | 0.075033  | 2.868260  |
| H  | 2.202422  | -1.338860 | 1.785532  |

(HH) Int 4A

E sol = -2118.256335

G sol = -2118.087014

|    |           |           |           |
|----|-----------|-----------|-----------|
| C  | -0.791281 | -2.144380 | 0.243826  |
| C  | -1.727445 | -1.223654 | 0.671062  |
| Br | -3.070141 | -0.490958 | -0.596814 |
| Cu | 0.108049  | -0.340272 | 0.460739  |
| O  | -0.194912 | 1.566152  | 1.312913  |
| C  | -1.222605 | 2.474519  | 0.828629  |
| H  | -2.159746 | 1.942206  | 0.999464  |
| H  | -1.209428 | 3.374604  | 1.452911  |
| C  | -1.031847 | 2.800071  | -0.643762 |
| H  | -1.024886 | 1.878451  | -1.236380 |
| H  | -1.852720 | 3.434576  | -0.998409 |
| H  | -0.089080 | 3.333615  | -0.811442 |
| H  | 0.665812  | 2.020298  | 1.309096  |
| C  | 2.019200  | -0.261137 | 0.017481  |
| C  | 2.602669  | 0.918985  | -0.500660 |
| C  | 2.910161  | -1.341194 | 0.218580  |
| C  | 3.970401  | 1.024694  | -0.795523 |
| H  | 1.972005  | 1.787213  | -0.696568 |
| C  | 4.280944  | -1.255396 | -0.064310 |
| H  | 2.523160  | -2.282871 | 0.608434  |
| C  | 4.818595  | -0.066643 | -0.574486 |
| H  | 4.372519  | 1.954123  | -1.196185 |
| H  | 4.929070  | -2.113151 | 0.109958  |
| H  | 5.880718  | 0.006390  | -0.798456 |
| H  | -0.308037 | -2.791087 | 0.976560  |
| H  | -0.719562 | -2.452113 | -0.796304 |
| H  | -2.071738 | -1.125249 | 1.696061  |

(II) TS 2A

E sol = -2430.457351

G sol = -2430.444060

|    |           |           |           |
|----|-----------|-----------|-----------|
| Cu | 0.220811  | -0.010569 | 0.112885  |
| Br | 0.705130  | 1.819056  | 1.727863  |
| C  | -1.375392 | -0.246568 | 2.687483  |
| H  | -2.149533 | 0.477667  | 2.456885  |
| H  | -1.634270 | -1.085334 | 3.332212  |
| C  | -0.142156 | -0.188626 | 2.179723  |
| H  | 0.698397  | -0.809833 | 2.477643  |
| C  | -0.884121 | -1.297042 | -0.839617 |
| C  | -0.730450 | -1.480445 | -2.232579 |
| C  | -1.886434 | -2.060681 | -0.214579 |

|   |           |           |           |
|---|-----------|-----------|-----------|
| C | -1.534791 | -2.370863 | -2.959219 |
| H | 0.027373  | -0.914838 | -2.772277 |
| C | -2.696767 | -2.958706 | -0.924193 |
| H | -2.043437 | -1.949117 | 0.858607  |
| C | -2.521811 | -3.117676 | -2.304403 |
| H | -1.390501 | -2.482027 | -4.032751 |
| H | -3.461071 | -3.533260 | -0.403069 |
| H | -3.145206 | -3.813569 | -2.861642 |
| O | 2.249975  | 0.205822  | -0.717800 |
| H | 2.611768  | 1.108436  | -0.728761 |
| C | 2.758507  | -0.548408 | -1.844249 |
| H | 2.249746  | -1.512384 | -1.775942 |
| H | 2.445981  | -0.060484 | -2.775872 |
| C | 4.269605  | -0.707215 | -1.779567 |
| H | 4.566873  | -1.202416 | -0.848595 |
| H | 4.617748  | -1.313879 | -2.624319 |
| H | 4.771124  | 0.266896  | -1.833499 |

(JJ) TS 3A

**E sol = - 2838.755251**

**G sol = -2838.628118**

|    |           |           |           |
|----|-----------|-----------|-----------|
| O  | 0.826855  | 1.794396  | 2.384720  |
| O  | 0.093230  | 1.267862  | -0.024466 |
| P  | 1.374668  | 1.960349  | 0.941984  |
| O  | 2.569293  | 1.051158  | 0.637665  |
| O  | 1.454329  | 3.399712  | 0.416683  |
| K  | 0.391890  | 3.267838  | -2.205719 |
| K  | 1.966948  | -0.863357 | 2.604470  |
| C  | -2.221118 | -0.376686 | 0.127786  |
| C  | -3.361685 | -0.461418 | -0.699222 |
| C  | -2.288380 | -1.080182 | 1.352673  |
| C  | -4.503303 | -1.185007 | -0.332309 |
| H  | -3.356765 | 0.067812  | -1.650814 |
| C  | -3.415333 | -1.815078 | 1.736085  |
| H  | -1.442917 | -1.031962 | 2.037571  |
| C  | -4.531668 | -1.867886 | 0.890126  |
| H  | -5.367077 | -1.218981 | -0.993864 |
| H  | -3.430099 | -2.340040 | 2.689483  |
| H  | -5.414627 | -2.431555 | 1.183011  |
| O  | -1.709302 | 1.992212  | 1.466043  |
| O  | -1.901052 | 2.187663  | -0.931118 |
| H  | -2.806245 | 2.473928  | -0.741547 |
| H  | -0.927865 | 1.898760  | 2.069502  |
| B  | -1.318859 | 1.546090  | 0.200811  |
| Cu | -0.357131 | -0.540281 | -0.727649 |
| C  | -0.323207 | -2.151349 | -1.928225 |
| C  | 0.950699  | -1.621585 | -1.842646 |

|    |           |           |           |
|----|-----------|-----------|-----------|
| Br | 2.340736  | -2.539040 | -0.768300 |
| H  | 1.404603  | -0.983654 | -2.594991 |
| H  | -0.956110 | -1.876048 | -2.772493 |
| H  | -0.618365 | -3.033404 | -1.365483 |

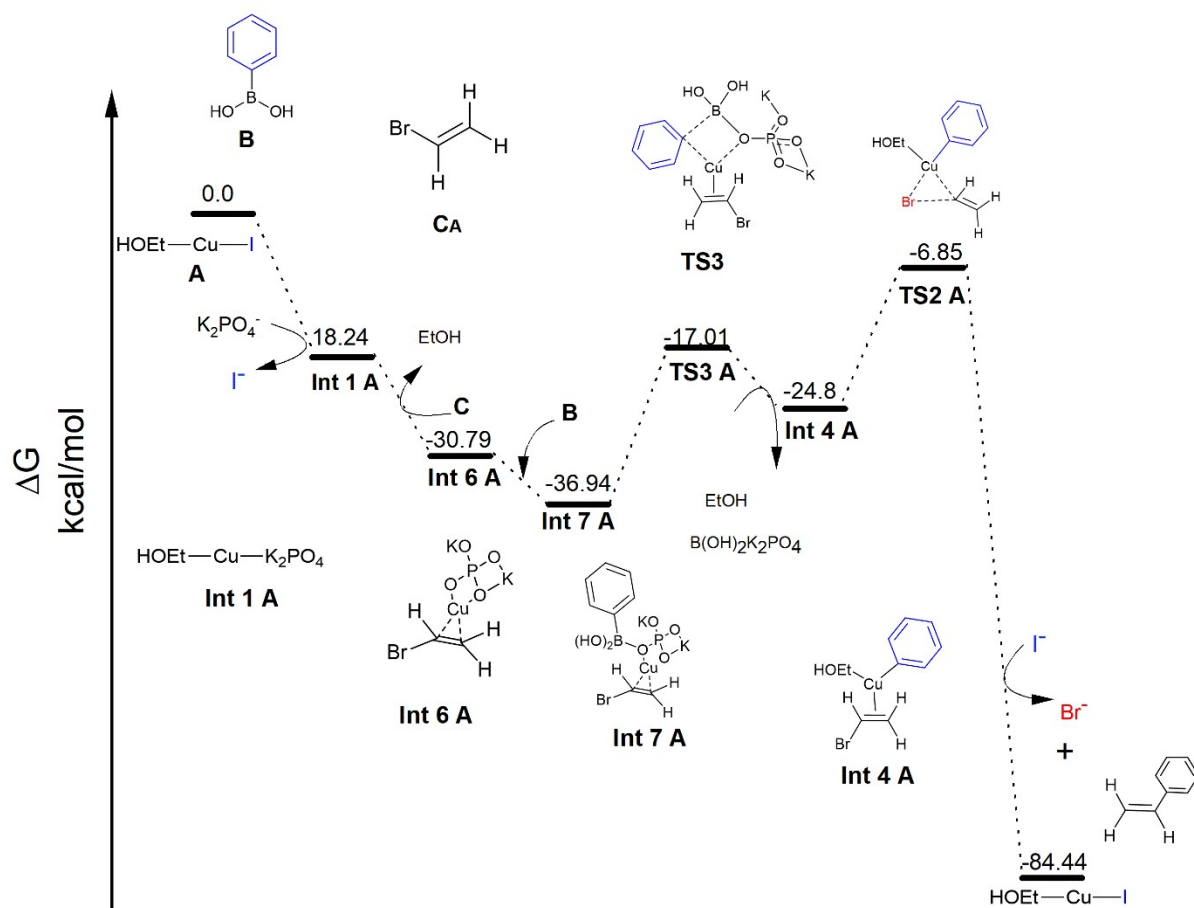

**Fig. S.1.** The free energy profile (kcal/mol) for Mechanism 2b elucidating the role of vinyl halide substrate as a pseudo-ligand in the ligand-free copper catalyzed Suzuki cross-coupling reaction calculated at DFT/B3LYP/-D3 method. LANL2DZ basis set for K, Br & I; 6-31+G (d) for C, H, N, O, P, Cu and B. Solvation = CPCM/ ethanol solvent.
